# Supplementary material
Source: ML conference proceedings conference paper supplement (https://proceedings.mlr.press/v119/meng20a.html)
Supplement: Supplementary file [file meng20a-supp.pdf]

---

# Training Binary Neural Networks using the Bayesian Learning Rule: Appendix

---

## A. Two equivalent forms of hysteresis function in Bop

The original update rule and the corresponding definition of the *hysteresis* function  $\text{hyst}(\cdot)$  in Bop are (Helweggen et al., 2019)

$$\mathbf{w}_r \leftarrow (1 - \alpha)\mathbf{w}_r + \alpha\mathbf{g}, \quad (22)$$

$$\begin{aligned} y &= \text{hyst1}(w_r, w_b, \gamma) \\ &\equiv \begin{cases} -w_b & \text{if } |w_r| > \gamma \ \& \ \text{sign}(w_r) = \text{sign}(w_b), \\ w_b & \text{otherwise.} \end{cases} \end{aligned} \quad (23)$$

One could obtain an alternative update rule  $\mathbf{w}_r \leftarrow (1 - \alpha)\mathbf{w}_r - \alpha\mathbf{g}$ , as shown in Step 3 of Bop in Table 1. In this case, the update rule and the corresponding *hysteresis* function are as follows

$$\mathbf{w}_r \leftarrow (1 - \alpha)\mathbf{w}_r - \alpha\mathbf{g}, \quad (24)$$

$$\begin{aligned} y &= \text{hyst2}(w_r, w_b, \gamma) \\ &\equiv \begin{cases} -w_b & \text{if } |w_r| > \gamma \ \& \ \text{sign}(w_r) = -\text{sign}(w_b), \\ w_b & \text{otherwise.} \end{cases} \end{aligned} \quad (25)$$

It could be easily verified that the above two update rules with two different representations of the *hysteresis* function are equivalent to each other: The only difference between (22) and (24) is the sign before the gradient  $\mathbf{g}$ , i.e., the  $\mathbf{w}_r$  in (22) is an exponential moving average (Gardner Jr, 1985) of  $\mathbf{g}$  while in (24) it is an exponential moving average of  $-\mathbf{g}$ . Such difference is compensated by the difference between (23) and (25). The corresponding curve of  $y = \text{hyst1}(w_r, w_b, \gamma)$  is simply a upside-down flipped version of  $y = \text{hyst2}(w_r, w_b, \gamma)$ , which is shown in the rightmost figure in Figure 1 (b).

## B. Experimental details

In this section we list the details for all experiments shown in the main text.

Note that after training BiNNs with BayesBiNN, there are two ways to perform inference during test time:

(1). **Mean:** One method is to use the predictive mean, where we use Monte Carlo sampling to compute the predictive probabilities for each test sample  $\mathbf{x}_j$  as follows

$$\hat{p}_{j,k} \approx \frac{1}{C} \sum_{c=1}^C p(y_j = k | \mathbf{x}_j, \mathbf{w}^{(c)}), \quad (26)$$

where  $\mathbf{w}^{(c)} \sim q(\mathbf{w})$  are samples from the Bernoulli distributions with the natural parameters  $\boldsymbol{\lambda}$  obtained by BayesBiNN.

(2). **Mode:** The other way is simply to use the mode of the posterior distribution  $q(\mathbf{w})$ , i.e., the sign value of the posterior mean, i.e.,  $\hat{\mathbf{w}} = \text{sign}(\tanh(\boldsymbol{\lambda}))$ , to make predictions, which will be denoted as  $C = 0$ .

### B.1. Synthetic Data

**Binary Classification** We used the Two Moons dataset with 100 data points in each class and added Gaussian noise with standard deviation 0.1 to each point. We trained a Multilayer Perceptron (MLP) with two hidden layers of 64 units and tanh

activation functions for 3000 epochs, using Cross Entropy as the loss function. Additional train and test settings with respect to the optimizers are detailed in Table 3. The learning rate  $\alpha$  was decayed at fixed epochs by the specified learning rate decay rate. For the STE baseline, we used the Adam optimizer with standard settings.

Table 3. Train settings for the binary classification experiment using the Two Moons dataset.

| Setting                    | BayesBiNN         | STE          |
|----------------------------|-------------------|--------------|
| Learning rate $\alpha$     | $10^{-3}$         | $10^{-1}$    |
| Learning rate decay        | 0.1               | 0.1          |
| Learning rate decay epochs | [1500, 2500]      | [1500, 2500] |
| Momentum(s) $\beta$        | 0.99              | 0.9, 0.999   |
| MC train samples $S$       | 5                 | -            |
| MC test samples $C$        | 0/10              | -            |
| Temperature $\tau$         | 1                 | -            |
| Prior $\lambda_0$          | <b>0</b>          | -            |
| Initialization $\lambda$   | $\pm 15$ randomly | -            |

**Regression** We used the Snelson dataset (Snelson & Ghahramani, 2005) with 200 data points to train a regression model. Similar to the Binary Classification experiment, we used an MLP with two hidden layers of 64 units and tanh activation functions, but trained it for 5000 epochs using Mean Squared Error as the loss function. Additionally, we added a batch normalization layer (without learned gain or bias terms) after the last fully connected layer. The learning rate is adjusted after every epoch to slowly anneal from an initial learning rate  $\alpha_0$  to a target learning rate  $\alpha_T$  at the maximum epoch  $T$  using

$$\alpha_{t+1} = \alpha_t \left( \frac{\alpha_T}{\alpha_0} \right)^{-T}. \tag{27}$$

The learning rates and other train and test settings are detailed in Table 4.

Table 4. Train settings for the regression experiment using the Snelson dataset (Snelson & Ghahramani, 2005).

| Setting                        | BayesBiNN         | STE        |
|--------------------------------|-------------------|------------|
| Learning rate start $\alpha_0$ | $10^{-4}$         | $10^{-1}$  |
| Learning rate end $\alpha_T$   | $10^{-5}$         | $10^{-1}$  |
| Momentum(s) $\beta$            | 0.99              | 0.9, 0.999 |
| MC train samples $S$           | 1                 | -          |
| MC test samples $C$            | 0/10              | -          |
| Temperature $\tau$             | 1                 | -          |
| Prior $\lambda_0$              | <b>0</b>          | -          |
| Initialization $\lambda$       | $\pm 10$ randomly | -          |

## B.2. MNIST, CIFAR-10 and CIFAR-100

In this section, three well-known image datasets are considered, namely the MNIST, CIFAR-10 and CIFAR-100 datasets. We compare the proposed BayesBiNN with four other popular algorithms, STE Adam, Bop and PMF for BiNNs as well as standard Adam for full-precision weights. For dataset and algorithm specific settings, see Table 9.

**MNIST** All algorithms have been trained using the same MLP detailed in Table 5 on mini-batches of size 100, for a maximum of 500 epochs. The loss used was Categorical Cross Entropy. We split the original training data into 90% train and 10% validation data and no data augmentation except normalization has been done. We report the best accuracy (averaged over 5 random runs) on the test set corresponding to the highest validation accuracy achieved during training (we do not retrain using the validation set). Note that we tune the hyper-parameters such as learning rate for all the methods including the baselines. The search space for the learning rate is set to be  $[10^{-2}, 3 \cdot 10^{-3}, 10^{-3}, 3 \cdot 10^{-4}, 10^{-4}, 3 \cdot 10^{-5}, 10^{-5}, 10^{-6}]$

for all methods. Moreover, Table 6 and Table 7 shows the results of MNIST with BayesBiNN for different choices of learning rate and temperature.

Table 5. The MLP architecture used in all MNIST experiments, adapted from (Alizadeh et al., 2019).

|                                                    |
|----------------------------------------------------|
| Dropout (p = 0.2)                                  |
| Fully Connected Layer (units = 2048, bias = False) |
| ReLU                                               |
| Batch Normalization Layer (gain = 1, bias = 0)     |
| Dropout (p = 0.2)                                  |
| Fully Connected Layer (units = 2048, bias = False) |
| ReLU                                               |
| Batch Normalization Layer (gain = 1, bias = 0)     |
| Dropout (p = 0.2)                                  |
| Fully Connected Layer (units = 2048, bias = False) |
| ReLU                                               |
| Batch Normalization Layer (gain = 1, bias = 0)     |
| Dropout (p = 0.2)                                  |
| Fully Connected Layer (units = 2048, bias = False) |
| Batch Normalization Layer (gain = 1, bias = 0)     |
| Softmax                                            |

Table 6. Test accuracy of MNIST for different initial learning rates. The temperature is  $10^{-10}$ . Results are averaged over 5 random runs.

| Learning rate       | $10^{-1}$           | $3 \cdot 10^{-3}$   | $10^{-3}$           | $3 \cdot 10^{-4}$   |
|---------------------|---------------------|---------------------|---------------------|---------------------|
| Training Accuracy   | $99.46 \pm 0.15 \%$ | $99.58 \pm 0.16 \%$ | $99.67 \pm 0.09 \%$ | $99.76 \pm 0.09 \%$ |
| Validation Accuracy | $98.90 \pm 0.14 \%$ | $98.94 \pm 0.17 \%$ | $98.96 \pm 0.13 \%$ | $98.97 \pm 0.12 \%$ |
| Test Accuracy       | $98.73 \pm 0.11 \%$ | $98.81 \pm 0.07 \%$ | $98.83 \pm 0.05 \%$ | $98.84 \pm 0.08 \%$ |
| Learning rate       | $10^{-4}$           | $3 \cdot 10^{-5}$   | $10^{-5}$           | $10^{-6}$           |
| Training Accuracy   | $99.85 \pm 0.05 \%$ | $99.83 \pm 0.06 \%$ | $99.76 \pm 0.09 \%$ | $99.78 \pm 0.03 \%$ |
| Validation Accuracy | $99.02 \pm 0.13 \%$ | $99.02 \pm 0.13 \%$ | $99.04 \pm 0.11 \%$ | $99.02 \pm 0.17 \%$ |
| Test Accuracy       | $98.86 \pm 0.05 \%$ | $98.86 \pm 0.05 \%$ | $98.84 \pm 0.08 \%$ | $98.85 \pm 0.05 \%$ |

**CIFAR-10 and CIFAR-100** We trained all algorithms on the Convolutional Neural Network (CNN) architecture detailed in Table 8 on mini-batches of size 50, for a maximum of 500 epochs. The loss used was Categorical Cross Entropy. We split the original training data into 90% train and 10% validation data. For data augmentation during training, the images were normalized, a random  $32 \times 32$  crop was selected from a  $40 \times 40$  padded image and finally a random horizontal flip was applied. In the same manner as Osawa et al. (2019), we consider such data augmentation as effectively increasing the dataset size by a factor of 10 (4 images for each corner, and one central image, and the horizontal flipping step further doubles the dataset size, which gives a total factor of 10). We report the best accuracy (averaged over 5 random runs) on the test set corresponding to the highest validation accuracy achieved during training. In addition, we tune the hyper-parameters, such as the learning rate, for all the methods including the baselines. The search space for the learning rate is set to be  $[10^{-2}, 3 \cdot 10^{-3}, 10^{-3}, 3 \cdot 10^{-4}, 10^{-4}, 3 \cdot 10^{-5}, 10^{-5}, 10^{-6}]$  for all methods.

### B.3. Comparison with LR-net

We also compare the proposed BayesBiNN with the LR-net method in Shayer et al. (2018) for MNIST and CIFAR-10. As the code for the LR-net is not open-source, we performed experiments with BayesBiNN following the same experimental

Table 7. Test accuracy of MNIST for different temperatures. The initial learning rate is  $10^{-4}$ . Results are averaged over 5 random runs.

| Temperature         | $10^{-3}$          | $10^{-4}$          | $10^{-5}$          | $10^{-6}$          | $10^{-7}$          |
|---------------------|--------------------|--------------------|--------------------|--------------------|--------------------|
| Training Accuracy   | $89.25 \pm 0.22$ % | $87.55 \pm 0.50$ % | $90.22 \pm 0.42$ % | $97.37 \pm 0.13$ % | $98.27 \pm 0.10$ % |
| Validation Accuracy | $90.06 \pm 1.04$ % | $90.28 \pm 0.43$ % | $93.35 \pm 0.48$ % | $98.10 \pm 0.17$ % | $98.55 \pm 0.16$ % |
| Test Accuracy       | $90.40 \pm 0.97$ % | $90.72 \pm 0.42$ % | $93.67 \pm 0.50$ % | $98.01 \pm 0.05$ % | $98.41 \pm 0.10$ % |
| Learning rate       | $10^{-8}$          | $10^{-9}$          | $10^{-10}$         | $10^{-11}$         | $10^{-12}$         |
| Training Accuracy   | $99.48 \pm 0.08$ % | $99.75 \pm 0.14$ % | $99.85 \pm 0.05$ % | $99.81 \pm 0.04$ % | $99.82 \pm 0.07$ % |
| Validation Accuracy | $98.92 \pm 0.13$ % | $99.00 \pm 0.13$ % | $99.02 \pm 0.14$ % | $99.02 \pm 0.12$ % | $99.02 \pm 0.13$ % |
| Test Accuracy       | $98.82 \pm 0.05$ % | $98.81 \pm 0.08$ % | $98.86 \pm 0.05$ % | $98.86 \pm 0.06$ % | $98.84 \pm 0.04$ % |

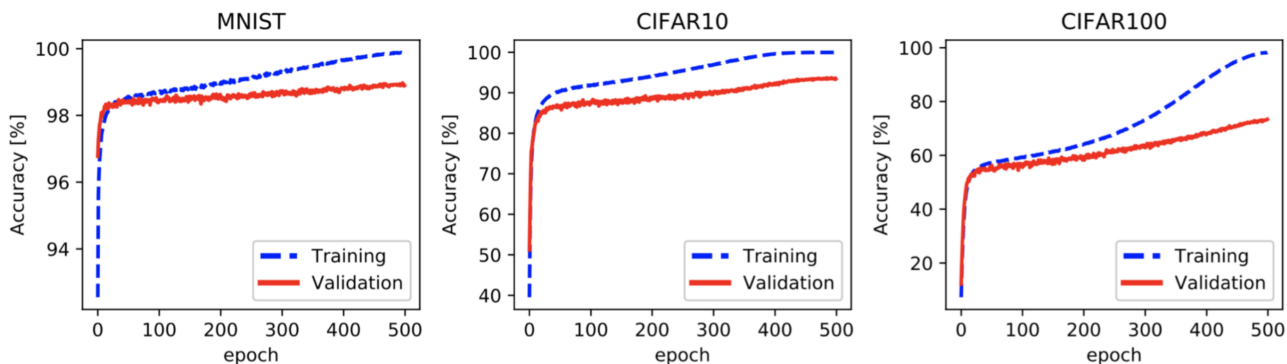

Figure 6. Training/Validation accuracy for MNIST, CIFAR-10 and CIFAR100 with BayesBiNN optimizer (Averaged over 5 runs).

settings in Shayer et al. (2018) and then compared the results with the reported results in their paper. In specific, the network architectures for MNIST and CIFAR-10 are the same as Shayer et al. (2018), except that we added BN after the FC layers. However, we kept all layers binary and did not learn the BN parameters, nor did we use dropout as in Shayer et al. (2018). The dataset pre-processing follows the same settings in Shayer et al. (2018) and is similar to that described in subsection 4.2, except that there is no split of the training set into training and validation sets. As a result, as in Shayer et al. (2018), we report the test accuracies after 190 epochs and 290 epochs for MNIST and CIFAR-10, respectively. Note that the hyper-parameter settings of BayesBiNN are the same as those in Table 9 for MNIST and CIFAR-10. The results are shown in Table 11. The proposed BayesBiNN achieves similar performance (slightly better for CIFAR-10) to the LR-net. Note that the LR-net method used pre-trained models to initialize the weights of BiNNs, while BayesBiNN trained BiNNs from scratch without using pre-trained models.

#### B.4. Continual learning with binary neural networks

For the continual learning experiment, we used a three-layer MLP, detailed in Table 12, and trained it using the Categorical Cross Entropy loss. Specific training parameters are given in Table 13. There is no split of the original MNIST training data in the continual learning case. No data augmentation except normalization has been performed.

### C. Author Contributions Statement

M.E.K. conceived the idea of training Binary neural networks using the Bayesian learning rule. X.M. derived the BayesBiNN algorithm, studied its connections to STE and Bop, and wrote the first proof-of-concept experiments. R.B. fixed a few issue with the original implementation and re-organized the PyTorch code. R.B. also designed and performed the experiments on synthetic data presented in Section 4.1. X.M. did most of the experiments with some help from R.B. All the authors were involved in writing, revising and proof-reading the paper.

Table 8. The CNN architecture used in all CIFAR-10 and CIFAR-100 experiments, inspired by VGG and used in Alizadeh et al. (2019).

|                                                                                                                                                                                                                               |
|-------------------------------------------------------------------------------------------------------------------------------------------------------------------------------------------------------------------------------|
| Convolutional Layer (channels = 128, kernel-size = $3 \times 3$ , bias = False, padding = same)<br>ReLU<br>Batch Normalization Layer (gain = 1, bias = 0)                                                                     |
| Convolutional Layer (channels = 128, kernel-size = $3 \times 3$ , bias = False, padding = same)<br>ReLU<br>Max Pooling Layer (size = $2 \times 2$ , stride = $2 \times 2$ )<br>Batch Normalization Layer (gain = 1, bias = 0) |
| Convolutional Layer (channels = 256, kernel-size = $3 \times 3$ , bias = False, padding = same)<br>ReLU<br>Batch Normalization Layer (gain = 1, bias = 0)                                                                     |
| Convolutional Layer (channels = 256, kernel-size = $3 \times 3$ , bias = False, padding = same)<br>ReLU<br>Max Pooling Layer (size = $2 \times 2$ , stride = $2 \times 2$ )<br>Batch Normalization Layer (gain = 1, bias = 0) |
| Convolutional Layer (channels = 512, kernel-size = $3 \times 3$ , bias = False, padding = same)<br>ReLU<br>Batch Normalization Layer (gain = 1, bias = 0)                                                                     |
| Convolutional Layer (channels = 512, kernel-size = $3 \times 3$ , bias = False, padding = same)<br>ReLU<br>Max Pooling Layer (size = $2 \times 2$ , stride = $2 \times 2$ )<br>Batch Normalization Layer (gain = 1, bias = 0) |
| Fully Connected Layer (units = 1024, bias = False)<br>ReLU<br>Batch Normalization Layer (gain = 1, bias = 0)                                                                                                                  |
| Fully Connected Layer (units = 1024, bias = False)<br>ReLU<br>Batch Normalization Layer (gain = 1, bias = 0)                                                                                                                  |
| Fully Connected Layer (units = 1024, bias = False)<br>Batch Normalization Layer (gain = 1, bias = 0)<br>Softmax                                                                                                               |

Table 9. Algorithm specific train settings for MNIST, CIFAR-10, and CIFAR-100.

| Algorithm             | Setting                           | MNIST                 | CIFAR-10          | CIFAR-100         |
|-----------------------|-----------------------------------|-----------------------|-------------------|-------------------|
| BayesBiNN             | Learning rate start $\alpha_0$    | $10^{-4}$             | $3 \cdot 10^{-4}$ | $3 \cdot 10^{-4}$ |
|                       | Learning rate end $\alpha_T$      | $10^{-16}$            | $10^{-16}$        | $10^{-16}$        |
|                       | Learning rate decay               | Cosine                | Cosine            | Cosine            |
|                       | MC train samples $S$              | 1                     | 1                 | 1                 |
|                       | MC test samples $C$               | 0                     | 0                 | 0                 |
|                       | Temperature $\tau$                | $10^{-10}$            | $10^{-10}$        | $10^{-8}$         |
|                       | Prior $\lambda_0$                 | <b>0</b>              | <b>0</b>          | <b>0</b>          |
|                       | Initialization $\lambda$          | $\pm 10$ randomly     | $\pm 10$ randomly | $\pm 10$ randomly |
| STE Adam              | Learning rate start $\alpha_0$    | $10^{-2}$             | $10^{-2}$         | $10^{-2}$         |
|                       | Learning rate end $\alpha_T$      | $10^{-16}$            | $10^{-16}$        | $10^{-16}$        |
|                       | Learning rate decay               | Cosine                | Cosine            | Cosine            |
|                       | Gradient clipping                 | Yes                   | Yes               | Yes               |
|                       | Weights clipping                  | Yes                   | Yes               | Yes               |
| Bop                   | Threshold $\tau$                  | $10^{-8}$             | $10^{-8}$         | $10^{-9}$         |
|                       | Adaptivity rate $\gamma$          | $10^{-5}$             | $10^{-4}$         | $10^{-4}$         |
|                       | $\gamma$ -decay type              | Step                  | Step              | Step              |
|                       | $\gamma$ -decay rate              | $10^{\frac{-3}{500}}$ | 0.1               | 0.1               |
|                       | $\gamma$ -decay interval (epochs) | 1                     | 100               | 100               |
| PMF                   | Learning rate start               | $10^{-3}$             | $10^{-2}$         | $10^{-2}$         |
|                       | Learning rate decay type          | Step                  | Step              | Step              |
|                       | LR decay interval (iterations)    | 7k                    | 30k               | 30k               |
|                       | LR-scale                          | 0.2                   | 0.2               | 0.2               |
|                       | Optimizer                         | Adam                  | Adam              | Adam              |
|                       | Weight decay                      | 0                     | $10^{-4}$         | $10^{-4}$         |
|                       | $\rho$                            | 1.2                   | 1.05              | 1.05              |
| Adam (Full-precision) | Learning rate start $\alpha_0$    | $3 \cdot 10^{-4}$     | $10^{-2}$         | $3 \cdot 10^{-3}$ |
|                       | Learning rate end $\alpha_T$      | $10^{-16}$            | $10^{-16}$        | $10^{-16}$        |
|                       | Learning rate decay               | Cosine                | Cosine            | Cosine            |

Table 10. Detailed results of different optimizers trained on MNIST, CIFAR-10 and CIFAR-100 (Averaged over 5 runs).

| Dataset   | Optimizer               | Train Accuracy  | Validation Accuracy | Test Accuracy         |
|-----------|-------------------------|-----------------|---------------------|-----------------------|
| MNIST     | STE Adam                | 99.78 ± 0.10 %  | 99.02 ± 0.11 %      | <b>98.85 ± 0.09 %</b> |
|           | Bop                     | 99.23 ± 0.04 %  | 98.55 ± 0.05 %      | 98.47 ± 0.02 %        |
|           | PMF                     |                 | 99.06 ± 0.01 %      | 98.80 ± 0.06 %        |
|           | <b>BayesBiNN (mode)</b> | 99.85 ± 0.05 %  | 99.02 ± 0.13 %      | <b>98.86 ± 0.05 %</b> |
|           | <b>BayesBiNN (mean)</b> | 99.85 ± 0.05 %  | 99.02 ± 0.13 %      | <b>98.86 ± 0.05 %</b> |
|           | Full-precision          | 99.96 ± 0.02 %  | 99.15 ± 0.14 %      | 99.01 ± 0.06 %        |
| CIFAR-10  | STE Adam                | 99.99 ± 0.01 %  | 94.25 ± 0.42 %      | <b>93.55 ± 0.15 %</b> |
|           | Bop                     | 99.79 ± 0.03 %  | 93.49 ± 0.17 %      | 93.00 ± 0.11 %        |
|           | PMF                     |                 | 91.87 ± 0.10 %      | 91.43 ± 0.14 %        |
|           | <b>BayesBiNN (mode)</b> | 99.96 ± 0.01 %  | 94.23 ± 0.41 %      | <b>93.72 ± 0.16 %</b> |
|           | <b>BayesBiNN (mean)</b> | 99.96 ± 0.01 %  | 94.23 ± 0.41 %      | <b>93.72 ± 0.15 %</b> |
|           | Full-precision          | 100.00 ± 0.00 % | 94.54 ± 0.29 %      | 93.90 ± 0.17 %        |
| CIFAR-100 | STE Adam                | 99.06 ± 0.15 %  | 74.09 ± 0.15 %      | 72.89 ± 0.21 %        |
|           | Bop                     | 90.09 ± 0.57 %  | 69.97 ± 0.29 %      | 69.58 ± 0.15 %        |
|           | PMF                     |                 | 69.86 ± 0.08 %      | 70.45 ± 0.25 %        |
|           | <b>BayesBiNN (mode)</b> | 98.02 ± 0.18 %  | 74.76 ± 0.41 %      | <b>73.68 ± 0.31 %</b> |
|           | <b>BayesBiNN (mean)</b> | 98.02 ± 0.18 %  | 74.76 ± 0.41 %      | <b>73.65 ± 0.41 %</b> |
|           | Full-precision          | 99.89 ± 0.02 %  | 75.89 ± 0.41 %      | 74.83 ± 0.26 %        |

Table 11. Test accuracy of BayesBiNN and LR-net trained on MNIST, CIFAR-10. Results for BayesBiNN are averaged over 5 random runs.

| Optimizer                          | MNIST          | CIFAR-10       |
|------------------------------------|----------------|----------------|
| LR-net <i>Shayer et al. (2018)</i> | 99.47 %        | 93.18%         |
| <b>BayesBiNN (mode)</b>            | 99.50 ± 0.02 % | 93.97 ± 0.11 % |

 Table 12. The MLP architecture used for continual learning (*Nguyen et al., 2018*)

|                                                   |
|---------------------------------------------------|
| Fully Connected Layer (units = 100, bias = False) |
| ReLU                                              |
| Batch Normalization Layer (gain = 1, bias = 0)    |
| Fully Connected Layer (units = 100, bias = False) |
| ReLU                                              |
| Batch Normalization Layer (gain = 1, bias = 0)    |
| Fully Connected Layer (units = 100, bias = False) |
| ReLU                                              |
| Batch Normalization Layer (gain = 1, bias = 0)    |
| Softmax                                           |

Table 13. Algorithm specific train settings for continual learning on permuted MNIST.

| Algorithm | Setting                        | Permuted MNIST                         |
|-----------|--------------------------------|----------------------------------------|
| BayesBiNN | Learning rate start $\alpha_0$ | $10^{-3}$                              |
|           | Learning rate end $\alpha_T$   | $10^{-16}$                             |
|           | Learning rate decay            | Cosine                                 |
|           | MC train samples $S$           | 1                                      |
|           | MC test samples $C$            | 100                                    |
|           | Temperature $\tau$             | $10^{-2}$                              |
|           | Prior $\lambda_0$              | learned $\lambda$ of the previous task |
|           | Initialization $\lambda$       | $\pm 10$ randomly                      |
|           | Batch size                     | 100                                    |
|           | Number of epochs               | 100                                    |
